# Supplementary material
Source: publisher figshare collection journal article supplement (https://acs.figshare.com/ndownloader/files/5064472)
Supplement: Supplementary file 1 [file 5064472]

 
data_dt0737r 
 
_audit_creation_method            SHELXL-97 
_chemical_name_systematic 
; 
 ? 
; 
_chemical_name_common             ? 
_chemical_melting_point           ? 
_chemical_formula_moiety          ? 
_chemical_formula_sum 
 'C32 H60 N4 O8' 
_chemical_formula_weight          628.84 
 
loop_ 
 _atom_type_symbol 
 _atom_type_description 
 _atom_type_scat_dispersion_real 
 _atom_type_scat_dispersion_imag 
 _atom_type_scat_source 
 'C'  'C'   0.0033   0.0016 
 'International Tables Vol C Tables 4.2.6.8 and 6.1.1.4' 
 'H'  'H'   0.0000   0.0000 
 'International Tables Vol C Tables 4.2.6.8 and 6.1.1.4' 
 'N'  'N'   0.0061   0.0033 
 'International Tables Vol C Tables 4.2.6.8 and 6.1.1.4' 
 'O'  'O'   0.0106   0.0060 
 'International Tables Vol C Tables 4.2.6.8 and 6.1.1.4' 
 
_symmetry_cell_setting            'TRICLINIC' 
_symmetry_space_group_name_H-M    'P -1'  
 
loop_ 
 _symmetry_equiv_pos_as_xyz 
 'x, y, z' 
 '-x, -y, -z' 
 
_cell_length_a                    10.7741(7) 
_cell_length_b                    12.4712(8) 
_cell_length_c                    14.9297(10) 
_cell_angle_alpha                 68.4380(10) 
_cell_angle_beta                  71.4390(10) 
_cell_angle_gamma                 68.5450(10) 
_cell_volume                      1696.74(19) 
_cell_formula_units_Z             2 
_cell_measurement_temperature     293(2) 
_cell_measurement_reflns_used     ? 
_cell_measurement_theta_min       ? 
_cell_measurement_theta_max       ? 
 
_exptl_crystal_description        PLATE
_exptl_crystal_colour             COLOURLESS 
_exptl_crystal_size_max           0.58
_exptl_crystal_size_mid           0.46 
_exptl_crystal_size_min           0.22 
_exptl_crystal_density_meas       ? 
_exptl_crystal_density_diffrn     1.231 
_exptl_crystal_density_method     'not measured' 
_exptl_crystal_F_000              688 
_exptl_absorpt_coefficient_mu     0.088 
_exptl_absorpt_correction_type    'SADABS' 
_exptl_absorpt_correction_T_min   ? 
_exptl_absorpt_correction_T_max   ? 
_exptl_absorpt_process_details    ? 
 
_exptl_special_details 
; 
 ? 
; 
 
_diffrn_ambient_temperature       293(2) 
_diffrn_radiation_wavelength      0.71073 
_diffrn_radiation_type            MoK\a 
_diffrn_radiation_source          'fine-focus sealed tube' 
_diffrn_radiation_monochromator   graphite 
_diffrn_measurement_device_type   'BRUKER SMART CCD AREA DETECTOR' 
_diffrn_measurement_method        'PHI-OMEGA' 
_diffrn_detector_area_resol_mean  0.3 
_diffrn_standards_number          ? 
_diffrn_standards_interval_count  ? 
_diffrn_standards_interval_time   ? 
_diffrn_standards_decay_%         '< 10%' 
_diffrn_reflns_number             6944 
_diffrn_reflns_av_R_equivalents   0.0117 
_diffrn_reflns_av_sigmaI/netI     0.0209 
_diffrn_reflns_limit_h_min        -11 
_diffrn_reflns_limit_h_max        11 
_diffrn_reflns_limit_k_min        -13 
_diffrn_reflns_limit_k_max        13 
_diffrn_reflns_limit_l_min        -11 
_diffrn_reflns_limit_l_max        16 
_diffrn_reflns_theta_min          1.83 
_diffrn_reflns_theta_max          22.50 
_reflns_number_total              4424 
_reflns_number_gt                 3994 
_reflns_threshold_expression      >2sigma(I) 
 
_computing_data_collection        'BRUKER AXS SMART 3'
_computing_cell_refinement        'BRUKER AXS SMART 3'
_computing_data_reduction         'BRUKER AXS SMART 3'
_computing_structure_solution     'SHELXS-97 (Sheldrick, 1990)' 
_computing_structure_refinement   'SHELXL-97 (Sheldrick, 1997)' 
_computing_molecular_graphics     'PLATON, MERCURY 1.4' 
_computing_publication_material   ? 
 
_refine_special_details 
; 
 Refinement of F^2^ against ALL reflections.  The weighted R-factor wR and 
 goodness of fit S are based on F^2^, conventional R-factors R are based 
 on F, with F set to zero for negative F^2^. The threshold expression of 
 F^2^ > 2sigma(F^2^) is used only for calculating R-factors(gt) etc. and is 
 not relevant to the choice of reflections for refinement.  R-factors based 
 on F^2^ are statistically about twice as large as those based on F, and R- 
 factors based on ALL data will be even larger. 
; 
 
_refine_ls_structure_factor_coef  Fsqd  
_refine_ls_matrix_type            full 
_refine_ls_weighting_scheme       calc  
_refine_ls_weighting_details 
 'calc w=1/[\s^2^(Fo^2^)+(0.0606P)^2^+2.6150P] where P=(Fo^2^+2Fc^2^)/3' 
_atom_sites_solution_primary      direct 
_atom_sites_solution_secondary    difmap 
_atom_sites_solution_hydrogens    geom 
_refine_ls_hydrogen_treatment     mixed 
_refine_ls_extinction_method      none 
_refine_ls_extinction_coef        ? 
_refine_ls_number_reflns          4424 
_refine_ls_number_parameters      446 
_refine_ls_number_restraints      0 
_refine_ls_R_factor_all           0.0580 
_refine_ls_R_factor_gt            0.0532 
_refine_ls_wR_factor_ref          0.1386 
_refine_ls_wR_factor_gt           0.1339 
_refine_ls_goodness_of_fit_ref    1.038 
_refine_ls_restrained_S_all       1.038 
_refine_ls_shift/su_max           0.000 
_refine_ls_shift/su_mean          0.000 
 
loop_ 
 _atom_site_label 
 _atom_site_type_symbol 
 _atom_site_fract_x 
 _atom_site_fract_y 
 _atom_site_fract_z 
 _atom_site_U_iso_or_equiv 
 _atom_site_adp_type 
 _atom_site_occupancy 
 _atom_site_symmetry_multiplicity 
 _atom_site_calc_flag 
 _atom_site_refinement_flags 
 _atom_site_disorder_assembly 
 _atom_site_disorder_group 
N2 N 0.8759(2) 0.4653(2) 0.14676(17) 0.0191(5) Uani 1 1 d . . . 
H2N2 H 0.968(4) 0.458(3) 0.130(2) 0.035(8) Uiso 1 1 d . . . 
H2N1 H 0.861(3) 0.395(3) 0.187(2) 0.027(8) Uiso 1 1 d . . . 
H2N3 H 0.852(3) 0.481(3) 0.084(3) 0.038(8) Uiso 1 1 d . . . 
C1B C 0.7952(3) 0.5640(2) 0.19344(18) 0.0207(6) Uani 1 1 d . . . 
H1B H 0.8320 0.5533 0.2492 0.025 Uiso 1 1 calc R . . 
C2B C 0.7993(3) 0.6868(2) 0.1181(2) 0.0248(6) Uani 1 1 d . . . 
H2B1 H 0.8160 0.7375 0.1465 0.030 Uiso 1 1 calc R . . 
H2B2 H 0.8704 0.6772 0.0599 0.030 Uiso 1 1 calc R . . 
C3B C 0.6593(3) 0.7405(2) 0.0926(2) 0.0259(6) Uani 1 1 d . . . 
H3B1 H 0.6365 0.8275 0.0692 0.031 Uiso 1 1 calc R . . 
H3B2 H 0.6550 0.7103 0.0426 0.031 Uiso 1 1 calc R . . 
C4B C 0.5648(3) 0.6989(2) 0.1899(2) 0.0263(6) Uani 1 1 d . . . 
H4B1 H 0.4772 0.7057 0.1800 0.032 Uiso 1 1 calc R . . 
H4B2 H 0.5505 0.7447 0.2344 0.032 Uiso 1 1 calc R . . 
C5B C 0.6431(3) 0.5677(2) 0.2288(2) 0.0262(6) Uani 1 1 d . . . 
H5B1 H 0.6234 0.5165 0.2025 0.031 Uiso 1 1 calc R . . 
H5B2 H 0.6186 0.5409 0.3002 0.031 Uiso 1 1 calc R . . 
N1 N 0.3693(2) 0.1591(2) 0.42318(17) 0.0195(5) Uani 1 1 d . . . 
H1N1 H 0.444(3) 0.168(2) 0.431(2) 0.026(8) Uiso 1 1 d . . . 
H1N2 H 0.362(3) 0.195(3) 0.363(2) 0.024(8) Uiso 1 1 d . . . 
H1N3 H 0.379(3) 0.070(3) 0.437(2) 0.051(10) Uiso 1 1 d . . . 
C1A C 0.2445(2) 0.2135(2) 0.48869(18) 0.0190(6) Uani 1 1 d . . . 
H1A H 0.1649 0.2078 0.4743 0.023 Uiso 1 1 calc R . . 
C2A C 0.2262(3) 0.3459(2) 0.47569(19) 0.0249(6) Uani 1 1 d . . . 
H2A1 H 0.3124 0.3652 0.4457 0.030 Uiso 1 1 calc R . . 
H2A2 H 0.1610 0.3982 0.4345 0.030 Uiso 1 1 calc R . . 
C3A C 0.1731(4) 0.3601(3) 0.5802(2) 0.0421(8) Uani 1 1 d . . . 
H3A1 H 0.2412 0.3752 0.6000 0.051 Uiso 1 1 calc R . . 
H3A2 H 0.0907 0.4266 0.5831 0.051 Uiso 1 1 calc R . . 
C4A C 0.1438(3) 0.2437(3) 0.6465(2) 0.0388(8) Uani 1 1 d . . . 
H4A1 H 0.0508 0.2462 0.6516 0.047 Uiso 1 1 calc R . . 
H4A2 H 0.1575 0.2270 0.7120 0.047 Uiso 1 1 calc R . . 
C5A C 0.2456(3) 0.1498(2) 0.59669(19) 0.0266(6) Uani 1 1 d . . . 
H5A1 H 0.3356 0.1286 0.6095 0.032 Uiso 1 1 calc R . . 
H5A2 H 0.2163 0.0777 0.6184 0.032 Uiso 1 1 calc R . . 
O1 O 0.58125(17) 0.29163(16) 0.32747(13) 0.0250(4) Uani 1 1 d . . . 
O2 O 0.80771(17) 0.25545(15) 0.28420(12) 0.0211(4) Uani 1 1 d . . . 
O3 O 0.83107(18) 0.03640(16) 0.50125(13) 0.0256(4) Uani 1 1 d . . . 
O4 O 0.60403(18) 0.07727(16) 0.52987(15) 0.0318(5) Uani 1 1 d . . . 
C1 C 0.6953(3) 0.2658(2) 0.34683(18) 0.0181(6) Uani 1 1 d . . . 
C2 C 0.7140(3) 0.1070(2) 0.50033(18) 0.0194(6) Uani 1 1 d . . . 
C3 C 0.6992(2) 0.2422(2) 0.45378(18) 0.0175(6) Uani 1 1 d . . . 
C4 C 0.8018(3) 0.2879(2) 0.47285(19) 0.0230(6) Uani 1 1 d . . . 
H4A H 0.8742 0.2240 0.5021 0.028 Uiso 1 1 calc R . . 
H4B H 0.8386 0.3453 0.4157 0.028 Uiso 1 1 calc R . . 
C5 C 0.6860(3) 0.3461(3) 0.5473(2) 0.0319(7) Uani 1 1 d . . . 
H5A H 0.6907 0.3025 0.6155 0.038 Uiso 1 1 calc R . . 
H5B H 0.6759 0.4306 0.5346 0.038 Uiso 1 1 calc R . . 
C6 C 0.5811(3) 0.3234(2) 0.51176(19) 0.0216(6) Uani 1 1 d . . . 
H6A H 0.5296 0.3951 0.4702 0.026 Uiso 1 1 calc R . . 
H6B H 0.5209 0.2810 0.5645 0.026 Uiso 1 1 calc R . . 
O1' O 0.13929(17) 0.48771(16) 0.04378(12) 0.0242(4) Uani 1 1 d . . . 
O2' O 0.35588(17) 0.49092(16) 0.00487(12) 0.0238(4) Uani 1 1 d . . . 
O3' O 0.31131(17) 0.28211(15) 0.23467(12) 0.0206(4) Uani 1 1 d . . . 
O4' O 0.08837(17) 0.36445(16) 0.28371(13) 0.0242(4) Uani 1 1 d . . . 
C1' C 0.2441(2) 0.4907(2) 0.06359(18) 0.0177(6) Uani 1 1 d . . . 
C2' C 0.2050(3) 0.3715(2) 0.23533(17) 0.0182(6) Uani 1 1 d . . . 
C3' C 0.2250(2) 0.4932(2) 0.16882(18) 0.0170(6) Uani 1 1 d . . . 
C4' C 0.1140(3) 0.6050(2) 0.19480(19) 0.0211(6) Uani 1 1 d . . . 
H4'1 H 0.0865 0.6692 0.1377 0.025 Uiso 1 1 calc R . . 
H4'2 H 0.0350 0.5862 0.2442 0.025 Uiso 1 1 calc R . . 
C5' C 0.2147(3) 0.6257(2) 0.2359(2) 0.0260(6) Uani 1 1 d . . . 
H5'1 H 0.1948 0.6046 0.3073 0.031 Uiso 1 1 calc R . . 
H5'2 H 0.2264 0.7058 0.2069 0.031 Uiso 1 1 calc R . . 
C6' C 0.3315(3) 0.5297(2) 0.19309(19) 0.0206(6) Uani 1 1 d . . . 
H6'1 H 0.3805 0.4665 0.2415 0.025 Uiso 1 1 calc R . . 
H6'2 H 0.3942 0.5627 0.1353 0.025 Uiso 1 1 calc R . . 
N1' N 0.5734(2) 0.3097(2) 0.14041(17) 0.0210(5) Uani 1 1 d . . . 
H1N4 H 0.586(3) 0.312(3) 0.201(3) 0.045(9) Uiso 1 1 d . . . 
H1N6 H 0.583(3) 0.380(3) 0.090(2) 0.037(9) Uiso 1 1 d . . . 
H1N5 H 0.482(4) 0.305(3) 0.157(2) 0.037(8) Uiso 1 1 d . . . 
C1A' C 0.6740(3) 0.2050(2) 0.1083(2) 0.0268(6) Uani 1 1 d . . . 
H1A' H 0.7659 0.2151 0.0882 0.032 Uiso 1 1 calc R . . 
C2A' C 0.6387(3) 0.1895(3) 0.0238(2) 0.0395(8) Uani 1 1 d . . . 
H2A3 H 0.5675 0.2588 -0.0018 0.047 Uiso 1 1 calc R . . 
H2A4 H 0.7183 0.1792 -0.0292 0.047 Uiso 1 1 calc R . . 
C3A' C 0.5914(8) 0.0811(4) 0.0668(5) 0.140(3) Uani 1 1 d . . . 
H3A3 H 0.5002 0.1009 0.0565 0.168 Uiso 1 1 calc R . . 
H3A4 H 0.6510 0.0212 0.0333 0.168 Uiso 1 1 calc R . . 
C4A' C 0.5896(7) 0.0340(4) 0.1653(4) 0.1001(19) Uani 1 1 d . . . 
H4A3 H 0.6289 -0.0524 0.1812 0.120 Uiso 1 1 calc R . . 
H4A4 H 0.4964 0.0511 0.2028 0.120 Uiso 1 1 calc R . . 
C5A' C 0.6702(4) 0.0892(3) 0.1905(2) 0.0446(9) Uani 1 1 d . . . 
H5A3 H 0.7618 0.0363 0.1936 0.054 Uiso 1 1 calc R . . 
H5A4 H 0.6267 0.1058 0.2537 0.054 Uiso 1 1 calc R . . 
N2' N 0.0670(3) 0.1339(2) 0.33547(19) 0.0185(11) Uani 0.956(14) 1 d P . . 
H2N4 H -0.013(4) 0.152(2) 0.333(2) 0.021(8) Uiso 1 1 d . . . 
H2N5 H 0.078(3) 0.089(3) 0.392(3) 0.036(9) Uiso 1 1 d . . . 
H2N6 H 0.084(3) 0.205(3) 0.324(2) 0.031(8) Uiso 1 1 d . . . 
C1B' C 0.1596(3) 0.0687(2) 0.2632(2) 0.0280(6) Uani 1 1 d . . . 
H1B' H 0.2537 0.0446 0.2712 0.034 Uiso 1 1 calc R . . 
C2B' C 0.1507(3) 0.1455(3) 0.1576(2) 0.0350(7) Uani 1 1 d . . . 
H2B3 H 0.1055 0.2292 0.1555 0.042 Uiso 1 1 calc R . . 
H2B4 H 0.2412 0.1394 0.1157 0.042 Uiso 1 1 calc R . . 
C3B' C 0.0716(5) 0.0989(4) 0.1244(3) 0.0679(13) Uani 1 1 d . . . 
H3B3 H -0.0206 0.1518 0.1260 0.081 Uiso 1 1 calc R . . 
H3B4 H 0.1131 0.0955 0.0572 0.081 Uiso 1 1 calc R . . 
C4B' C 0.0686(5) -0.0198(4) 0.1884(3) 0.0691(13) Uani 1 1 d . . . 
H4B3 H 0.1257 -0.0793 0.1539 0.083 Uiso 1 1 calc R . . 
H4B4 H -0.0239 -0.0261 0.2078 0.083 Uiso 1 1 calc R . . 
C5B' C 0.1187(4) -0.0425(3) 0.2767(2) 0.0417(8) Uani 1 1 d . . . 
H5B3 H 0.1966 -0.1133 0.2830 0.050 Uiso 1 1 calc R . . 
H5B4 H 0.0476 -0.0552 0.3355 0.050 Uiso 1 1 calc R . . 
 
loop_ 
 _atom_site_aniso_label 
 _atom_site_aniso_U_11 
 _atom_site_aniso_U_22 
 _atom_site_aniso_U_33 
 _atom_site_aniso_U_23 
 _atom_site_aniso_U_13 
 _atom_site_aniso_U_12 
N2 0.0180(13) 0.0223(13) 0.0157(12) -0.0022(10) -0.0028(10) -0.0082(10) 
C1B 0.0214(14) 0.0241(14) 0.0186(14) -0.0060(11) -0.0044(11) -0.0087(11) 
C2B 0.0263(15) 0.0235(15) 0.0260(15) -0.0057(12) -0.0034(12) -0.0119(12) 
C3B 0.0292(15) 0.0230(14) 0.0249(15) -0.0048(12) -0.0075(12) -0.0071(12) 
C4B 0.0207(14) 0.0289(15) 0.0304(15) -0.0115(12) -0.0043(12) -0.0062(12) 
C5B 0.0236(15) 0.0270(15) 0.0258(15) -0.0067(12) 0.0005(12) -0.0105(12) 
N1 0.0204(13) 0.0225(13) 0.0151(13) -0.0025(10) -0.0028(10) -0.0091(10) 
C1A 0.0160(13) 0.0231(14) 0.0180(13) -0.0049(11) -0.0031(10) -0.0070(11) 
C2A 0.0273(15) 0.0219(14) 0.0227(15) -0.0047(11) -0.0038(12) -0.0066(12) 
C3A 0.054(2) 0.0331(17) 0.0324(17) -0.0140(14) 0.0046(15) -0.0118(15) 
C4A 0.0462(19) 0.0364(18) 0.0216(16) -0.0083(13) 0.0010(14) -0.0053(15) 
C5A 0.0298(15) 0.0252(15) 0.0200(14) -0.0045(12) -0.0027(12) -0.0067(12) 
O1 0.0194(10) 0.0363(11) 0.0206(10) -0.0055(8) -0.0065(8) -0.0101(8) 
O2 0.0197(10) 0.0225(10) 0.0177(9) -0.0022(8) -0.0020(8) -0.0073(8) 
O3 0.0236(11) 0.0230(10) 0.0275(10) -0.0016(8) -0.0112(8) -0.0045(9) 
O4 0.0231(11) 0.0225(10) 0.0439(12) -0.0056(9) 0.0015(9) -0.0113(8) 
C1 0.0191(15) 0.0143(13) 0.0199(14) -0.0014(10) -0.0047(12) -0.0067(10) 
C2 0.0210(15) 0.0233(14) 0.0146(13) -0.0036(11) -0.0048(11) -0.0080(12) 
C3 0.0147(13) 0.0203(13) 0.0181(13) -0.0037(11) -0.0033(10) -0.0074(11) 
C4 0.0241(14) 0.0235(14) 0.0233(14) -0.0021(11) -0.0085(11) -0.0106(12) 
C5 0.0310(16) 0.0323(16) 0.0387(17) -0.0173(14) -0.0115(14) -0.0051(13) 
C6 0.0214(14) 0.0214(14) 0.0210(14) -0.0050(11) -0.0043(11) -0.0064(11) 
O1' 0.0182(10) 0.0389(11) 0.0180(10) -0.0073(8) -0.0039(8) -0.0115(8) 
O2' 0.0203(10) 0.0312(11) 0.0197(10) -0.0059(8) 0.0008(8) -0.0127(8) 
O3' 0.0199(10) 0.0194(10) 0.0202(10) -0.0022(7) -0.0056(7) -0.0054(8) 
O4' 0.0197(10) 0.0267(10) 0.0227(10) -0.0015(8) -0.0013(8) -0.0108(8) 
C1' 0.0167(14) 0.0137(13) 0.0192(14) -0.0008(10) -0.0036(12) -0.0046(10) 
C2' 0.0198(15) 0.0260(15) 0.0123(13) -0.0045(11) -0.0046(11) -0.0103(12) 
C3' 0.0137(13) 0.0185(13) 0.0188(13) -0.0045(11) -0.0040(10) -0.0048(10) 
C4' 0.0186(14) 0.0221(14) 0.0224(14) -0.0060(11) -0.0044(11) -0.0058(11) 
C5' 0.0263(15) 0.0267(15) 0.0296(15) -0.0109(12) -0.0070(12) -0.0088(12) 
C6' 0.0204(14) 0.0228(14) 0.0206(14) -0.0044(11) -0.0054(11) -0.0091(11) 
N1' 0.0198(13) 0.0243(13) 0.0166(12) -0.0023(10) -0.0025(10) -0.0083(10) 
C1A' 0.0192(14) 0.0272(15) 0.0316(16) -0.0089(12) -0.0026(12) -0.0056(12) 
C2A' 0.054(2) 0.0338(17) 0.0253(16) -0.0102(14) -0.0111(14) -0.0018(15) 
C3A' 0.289(9) 0.058(3) 0.148(5) 0.055(3) -0.185(6) -0.098(4) 
C4A' 0.164(5) 0.070(3) 0.080(3) -0.021(3) 0.011(3) -0.081(4) 
C5A' 0.066(2) 0.0256(17) 0.0325(18) -0.0037(14) -0.0195(16) 0.0006(16) 
N2' 0.0162(18) 0.0188(17) 0.0179(17) 0.0014(12) -0.0056(10) -0.0071(11) 
C1B' 0.0268(15) 0.0286(15) 0.0268(15) -0.0086(12) -0.0039(12) -0.0065(12) 
C2B' 0.0474(19) 0.0347(17) 0.0228(15) -0.0079(13) 0.0011(13) -0.0192(15) 
C3B' 0.112(4) 0.058(2) 0.055(2) 0.0153(19) -0.050(2) -0.052(2) 
C4B' 0.119(4) 0.057(2) 0.052(2) 0.0142(19) -0.040(2) -0.059(3) 
C5B' 0.064(2) 0.0234(16) 0.0366(18) -0.0063(14) -0.0144(16) -0.0104(15) 
 
_geom_special_details 
; 
 All esds (except the esd in the dihedral angle between two l.s. planes) 
 are estimated using the full covariance matrix.  The cell esds are taken 
 into account individually in the estimation of esds in distances, angles 
 and torsion angles; correlations between esds in cell parameters are only 
 used when they are defined by crystal symmetry.  An approximate (isotropic) 
 treatment of cell esds is used for estimating esds involving l.s. planes. 
; 
 
loop_ 
 _geom_bond_atom_site_label_1 
 _geom_bond_atom_site_label_2 
 _geom_bond_distance 
 _geom_bond_site_symmetry_2 
 _geom_bond_publ_flag 
N2 C1B 1.489(3) . ? 
N2 H2N2 0.92(3) . ? 
N2 H2N1 0.90(3) . ? 
N2 H2N3 0.99(3) . ? 
C1B C2B 1.538(4) . ? 
C1B C5B 1.542(4) . ? 
C1B H1B 0.9800 . ? 
C2B C3B 1.520(4) . ? 
C2B H2B1 0.9700 . ? 
C2B H2B2 0.9700 . ? 
C3B C4B 1.519(4) . ? 
C3B H3B1 0.9700 . ? 
C3B H3B2 0.9700 . ? 
C4B C5B 1.527(4) . ? 
C4B H4B1 0.9700 . ? 
C4B H4B2 0.9700 . ? 
C5B H5B1 0.9700 . ? 
C5B H5B2 0.9700 . ? 
N1 C1A 1.486(3) . ? 
N1 H1N1 0.90(3) . ? 
N1 H1N2 0.85(3) . ? 
N1 H1N3 1.02(4) . ? 
C1A C5A 1.515(4) . ? 
C1A C2A 1.534(4) . ? 
C1A H1A 0.9800 . ? 
C2A C3A 1.534(4) . ? 
C2A H2A1 0.9700 . ? 
C2A H2A2 0.9700 . ? 
C3A C4A 1.505(4) . ? 
C3A H3A1 0.9700 . ? 
C3A H3A2 0.9700 . ? 
C4A C5A 1.520(4) . ? 
C4A H4A1 0.9700 . ? 
C4A H4A2 0.9700 . ? 
C5A H5A1 0.9700 . ? 
C5A H5A2 0.9700 . ? 
O1 C1 1.251(3) . ? 
O2 C1 1.269(3) . ? 
O3 C2 1.247(3) . ? 
O4 C2 1.266(3) . ? 
C1 O1 1.251(3) 1 ? 
C1 O2 1.269(3) 1 ? 
C1 C3 1.525(4) . ? 
C2 O4 1.266(3) 1 ? 
C2 C3 1.538(4) . ? 
C3 C6 1.547(3) . ? 
C3 C4 1.551(3) . ? 
C4 C5 1.538(4) . ? 
C4 H4A 0.9700 . ? 
C4 H4B 0.9700 . ? 
C5 C6 1.537(4) . ? 
C5 H5A 0.9700 . ? 
C5 H5B 0.9700 . ? 
C6 H6A 0.9700 . ? 
C6 H6B 0.9700 . ? 
O1' C1' 1.270(3) . ? 
O2' C1' 1.244(3) . ? 
O3' C2' 1.273(3) . ? 
O4' C2' 1.251(3) . ? 
C1' C3' 1.529(4) . ? 
C2' O4' 1.251(3) 1 ? 
C2' O3' 1.273(3) 1 ? 
C2' C3' 1.527(3) . ? 
C3' C4' 1.551(3) . ? 
C3' C6' 1.556(3) . ? 
C4' C5' 1.538(4) . ? 
C4' H4'1 0.9700 . ? 
C4' H4'2 0.9700 . ? 
C5' C6' 1.541(4) . ? 
C5' H5'1 0.9700 . ? 
C5' H5'2 0.9700 . ? 
C6' H6'1 0.9700 . ? 
C6' H6'2 0.9700 . ? 
N1' C1A' 1.484(3) . ? 
N1' H1N4 0.97(4) . ? 
N1' H1N6 0.93(3) . ? 
N1' H1N5 0.96(3) . ? 
C1A' C5A' 1.517(4) . ? 
C1A' C2A' 1.519(4) . ? 
C1A' H1A' 0.9800 . ? 
C2A' C3A' 1.468(5) . ? 
C2A' H2A3 0.9700 . ? 
C2A' H2A4 0.9700 . ? 
C3A' C4A' 1.365(7) . ? 
C3A' H3A3 0.9700 . ? 
C3A' H3A4 0.9700 . ? 
C4A' C5A' 1.485(6) . ? 
C4A' H4A3 0.9700 . ? 
C4A' H4A4 0.9700 . ? 
C5A' H5A3 0.9700 . ? 
C5A' H5A4 0.9700 . ? 
N2' C1B' 1.479(4) . ? 
N2' H2N4 0.82(4) . ? 
N2' H2N5 0.84(4) . ? 
N2' H2N6 0.91(4) . ? 
C1B' C2B' 1.527(4) . ? 
C1B' C5B' 1.531(4) . ? 
C1B' H1B' 0.9800 . ? 
C2B' C3B' 1.467(5) . ? 
C2B' H2B3 0.9700 . ? 
C2B' H2B4 0.9700 . ? 
C3B' C4B' 1.443(5) . ? 
C3B' H3B3 0.9700 . ? 
C3B' H3B4 0.9700 . ? 
C4B' C5B' 1.474(5) . ? 
C4B' H4B3 0.9700 . ? 
C4B' H4B4 0.9700 . ? 
C5B' H5B3 0.9700 . ? 
C5B' H5B4 0.9700 . ? 
 
loop_ 
 _geom_angle_atom_site_label_1 
 _geom_angle_atom_site_label_2 
 _geom_angle_atom_site_label_3 
 _geom_angle 
 _geom_angle_site_symmetry_1 
 _geom_angle_site_symmetry_3 
 _geom_angle_publ_flag 
C1B N2 H2N2 112.6(19) . . ? 
C1B N2 H2N1 110.8(18) . . ? 
H2N2 N2 H2N1 109(3) . . ? 
C1B N2 H2N3 111.7(17) . . ? 
H2N2 N2 H2N3 104(3) . . ? 
H2N1 N2 H2N3 108(2) . . ? 
N2 C1B C2B 110.4(2) . . ? 
N2 C1B C5B 111.4(2) . . ? 
C2B C1B C5B 105.7(2) . . ? 
N2 C1B H1B 109.7 . . ? 
C2B C1B H1B 109.7 . . ? 
C5B C1B H1B 109.7 . . ? 
C3B C2B C1B 104.8(2) . . ? 
C3B C2B H2B1 110.8 . . ? 
C1B C2B H2B1 110.8 . . ? 
C3B C2B H2B2 110.8 . . ? 
C1B C2B H2B2 110.8 . . ? 
H2B1 C2B H2B2 108.9 . . ? 
C4B C3B C2B 103.2(2) . . ? 
C4B C3B H3B1 111.1 . . ? 
C2B C3B H3B1 111.1 . . ? 
C4B C3B H3B2 111.1 . . ? 
C2B C3B H3B2 111.1 . . ? 
H3B1 C3B H3B2 109.1 . . ? 
C3B C4B C5B 102.5(2) . . ? 
C3B C4B H4B1 111.3 . . ? 
C5B C4B H4B1 111.3 . . ? 
C3B C4B H4B2 111.3 . . ? 
C5B C4B H4B2 111.3 . . ? 
H4B1 C4B H4B2 109.2 . . ? 
C4B C5B C1B 105.4(2) . . ? 
C4B C5B H5B1 110.7 . . ? 
C1B C5B H5B1 110.7 . . ? 
C4B C5B H5B2 110.7 . . ? 
C1B C5B H5B2 110.7 . . ? 
H5B1 C5B H5B2 108.8 . . ? 
C1A N1 H1N1 110.9(18) . . ? 
C1A N1 H1N2 108.8(19) . . ? 
H1N1 N1 H1N2 108(3) . . ? 
C1A N1 H1N3 110.3(19) . . ? 
H1N1 N1 H1N3 110(3) . . ? 
H1N2 N1 H1N3 109(3) . . ? 
N1 C1A C5A 112.1(2) . . ? 
N1 C1A C2A 113.3(2) . . ? 
C5A C1A C2A 105.7(2) . . ? 
N1 C1A H1A 108.5 . . ? 
C5A C1A H1A 108.5 . . ? 
C2A C1A H1A 108.5 . . ? 
C3A C2A C1A 105.2(2) . . ? 
C3A C2A H2A1 110.7 . . ? 
C1A C2A H2A1 110.7 . . ? 
C3A C2A H2A2 110.7 . . ? 
C1A C2A H2A2 110.7 . . ? 
H2A1 C2A H2A2 108.8 . . ? 
C4A C3A C2A 106.3(2) . . ? 
C4A C3A H3A1 110.5 . . ? 
C2A C3A H3A1 110.5 . . ? 
C4A C3A H3A2 110.5 . . ? 
C2A C3A H3A2 110.5 . . ? 
H3A1 C3A H3A2 108.7 . . ? 
C3A C4A C5A 104.2(2) . . ? 
C3A C4A H4A1 110.9 . . ? 
C5A C4A H4A1 110.9 . . ? 
C3A C4A H4A2 110.9 . . ? 
C5A C4A H4A2 110.9 . . ? 
H4A1 C4A H4A2 108.9 . . ? 
C1A C5A C4A 102.5(2) . . ? 
C1A C5A H5A1 111.3 . . ? 
C4A C5A H5A1 111.3 . . ? 
C1A C5A H5A2 111.3 . . ? 
C4A C5A H5A2 111.3 . . ? 
H5A1 C5A H5A2 109.2 . . ? 
O1 C1 O2 124.6(2) 1 . ? 
O1 C1 O2 124.6(2) . . ? 
O1 C1 O2 124.6(2) 1 1 ? 
O1 C1 O2 124.6(2) . 1 ? 
O1 C1 C3 117.4(2) 1 . ? 
O1 C1 C3 117.4(2) . . ? 
O2 C1 C3 118.0(2) . . ? 
O2 C1 C3 118.0(2) 1 . ? 
O3 C2 O4 125.8(2) . 1 ? 
O3 C2 O4 125.8(2) . . ? 
O4 C2 O4 0.0(2) 1 . ? 
O3 C2 C3 118.4(2) . . ? 
O4 C2 C3 115.7(2) 1 . ? 
O4 C2 C3 115.7(2) . . ? 
C1 C3 C2 104.67(19) . . ? 
C1 C3 C6 116.4(2) . . ? 
C2 C3 C6 114.3(2) . . ? 
C1 C3 C4 117.5(2) . . ? 
C2 C3 C4 115.0(2) . . ? 
C6 C3 C4 89.09(19) . . ? 
C5 C4 C3 89.31(19) . . ? 
C5 C4 H4A 113.8 . . ? 
C3 C4 H4A 113.8 . . ? 
C5 C4 H4B 113.8 . . ? 
C3 C4 H4B 113.8 . . ? 
H4A C4 H4B 111.0 . . ? 
C6 C5 C4 90.0(2) . . ? 
C6 C5 H5A 113.6 . . ? 
C4 C5 H5A 113.6 . . ? 
C6 C5 H5B 113.6 . . ? 
C4 C5 H5B 113.6 . . ? 
H5A C5 H5B 110.9 . . ? 
C5 C6 C3 89.48(19) . . ? 
C5 C6 H6A 113.7 . . ? 
C3 C6 H6A 113.7 . . ? 
C5 C6 H6B 113.7 . . ? 
C3 C6 H6B 113.7 . . ? 
H6A C6 H6B 111.0 . . ? 
O2' C1' O1' 124.9(2) . . ? 
O2' C1' C3' 120.3(2) . . ? 
O1' C1' C3' 114.8(2) . . ? 
O4' C2' O3' 124.5(2) 1 . ? 
O4' C2' O3' 124.5(2) . . ? 
O4' C2' O3' 124.5(2) 1 1 ? 
O4' C2' O3' 124.5(2) . 1 ? 
O4' C2' C3' 119.6(2) 1 . ? 
O4' C2' C3' 119.6(2) . . ? 
O3' C2' C3' 115.9(2) . . ? 
O3' C2' C3' 115.9(2) 1 . ? 
C2' C3' C1' 105.61(19) . . ? 
C2' C3' C4' 115.8(2) . . ? 
C1' C3' C4' 114.0(2) . . ? 
C2' C3' C6' 113.5(2) . . ? 
C1' C3' C6' 118.8(2) . . ? 
C4' C3' C6' 89.04(18) . . ? 
C5' C4' C3' 89.79(19) . . ? 
C5' C4' H4'1 113.7 . . ? 
C3' C4' H4'1 113.7 . . ? 
C5' C4' H4'2 113.7 . . ? 
C3' C4' H4'2 113.7 . . ? 
H4'1 C4' H4'2 110.9 . . ? 
C4' C5' C6' 90.07(19) . . ? 
C4' C5' H5'1 113.6 . . ? 
C6' C5' H5'1 113.6 . . ? 
C4' C5' H5'2 113.6 . . ? 
C6' C5' H5'2 113.6 . . ? 
H5'1 C5' H5'2 110.9 . . ? 
C5' C6' C3' 89.49(18) . . ? 
C5' C6' H6'1 113.7 . . ? 
C3' C6' H6'1 113.7 . . ? 
C5' C6' H6'2 113.7 . . ? 
C3' C6' H6'2 113.7 . . ? 
H6'1 C6' H6'2 111.0 . . ? 
C1A' N1' H1N4 111.3(19) . . ? 
C1A' N1' H1N6 108.6(18) . . ? 
H1N4 N1' H1N6 110(3) . . ? 
C1A' N1' H1N5 112.7(18) . . ? 
H1N4 N1' H1N5 103(3) . . ? 
H1N6 N1' H1N5 111(3) . . ? 
N1' C1A' C5A' 110.6(2) . . ? 
N1' C1A' C2A' 111.1(2) . . ? 
C5A' C1A' C2A' 105.1(2) . . ? 
N1' C1A' H1A' 110.0 . . ? 
C5A' C1A' H1A' 110.0 . . ? 
C2A' C1A' H1A' 110.0 . . ? 
C3A' C2A' C1A' 105.0(3) . . ? 
C3A' C2A' H2A3 110.8 . . ? 
C1A' C2A' H2A3 110.8 . . ? 
C3A' C2A' H2A4 110.8 . . ? 
C1A' C2A' H2A4 110.8 . . ? 
H2A3 C2A' H2A4 108.8 . . ? 
C4A' C3A' C2A' 112.1(4) . . ? 
C4A' C3A' H3A3 109.2 . . ? 
C2A' C3A' H3A3 109.2 . . ? 
C4A' C3A' H3A4 109.2 . . ? 
C2A' C3A' H3A4 109.2 . . ? 
H3A3 C3A' H3A4 107.9 . . ? 
C3A' C4A' C5A' 108.3(4) . . ? 
C3A' C4A' H4A3 110.0 . . ? 
C5A' C4A' H4A3 110.0 . . ? 
C3A' C4A' H4A4 110.0 . . ? 
C5A' C4A' H4A4 110.0 . . ? 
H4A3 C4A' H4A4 108.4 . . ? 
C4A' C5A' C1A' 105.1(3) . . ? 
C4A' C5A' H5A3 110.7 . . ? 
C1A' C5A' H5A3 110.7 . . ? 
C4A' C5A' H5A4 110.7 . . ? 
C1A' C5A' H5A4 110.7 . . ? 
H5A3 C5A' H5A4 108.8 . . ? 
C1B' N2' H2N4 112.2(19) . . ? 
C1B' N2' H2N5 108(2) . . ? 
H2N4 N2' H2N5 110(3) . . ? 
C1B' N2' H2N6 111.7(18) . . ? 
H2N4 N2' H2N6 105(3) . . ? 
H2N5 N2' H2N6 110(3) . . ? 
N2' C1B' C2B' 111.5(2) . . ? 
N2' C1B' C5B' 110.7(2) . . ? 
C2B' C1B' C5B' 105.3(2) . . ? 
N2' C1B' H1B' 109.7 . . ? 
C2B' C1B' H1B' 109.7 . . ? 
C5B' C1B' H1B' 109.7 . . ? 
C3B' C2B' C1B' 106.4(2) . . ? 
C3B' C2B' H2B3 110.4 . . ? 
C1B' C2B' H2B3 110.4 . . ? 
C3B' C2B' H2B4 110.4 . . ? 
C1B' C2B' H2B4 110.4 . . ? 
H2B3 C2B' H2B4 108.6 . . ? 
C4B' C3B' C2B' 109.2(3) . . ? 
C4B' C3B' H3B3 109.8 . . ? 
C2B' C3B' H3B3 109.8 . . ? 
C4B' C3B' H3B4 109.8 . . ? 
C2B' C3B' H3B4 109.8 . . ? 
H3B3 C3B' H3B4 108.3 . . ? 
C3B' C4B' C5B' 109.4(3) . . ? 
C3B' C4B' H4B3 109.8 . . ? 
C5B' C4B' H4B3 109.8 . . ? 
C3B' C4B' H4B4 109.8 . . ? 
C5B' C4B' H4B4 109.8 . . ? 
H4B3 C4B' H4B4 108.2 . . ? 
C4B' C5B' C1B' 106.8(3) . . ? 
C4B' C5B' H5B3 110.4 . . ? 
C1B' C5B' H5B3 110.4 . . ? 
C4B' C5B' H5B4 110.4 . . ? 
C1B' C5B' H5B4 110.4 . . ? 
H5B3 C5B' H5B4 108.6 . . ? 
 
loop_ 
 _geom_hbond_atom_site_label_D 
 _geom_hbond_atom_site_label_H 
 _geom_hbond_atom_site_label_A 
 _geom_hbond_distance_DH 
 _geom_hbond_distance_HA 
 _geom_hbond_distance_DA 
 _geom_hbond_angle_DHA 
 _geom_hbond_site_symmetry_A 
N2 H2N2 O1'  0.92(3) 1.96(3) 2.825(3) 156(3) 1_655 
N2 H2N1 O2  0.90(3) 1.96(3) 2.846(3) 172(3) 1 
N2 H2N3 O1'  0.99(3) 1.77(3) 2.732(3) 162(3) 2_665 
N1 H1N1 O1  0.90(3) 2.33(3) 2.990(3) 131(2) 1 
N1 H1N2 O3'  0.85(3) 1.97(3) 2.812(3) 170(3) 1 
N1 H1N3 O4  1.02(4) 1.67(4) 2.693(3) 175(3) 2_656 
N1' H1N4 O1  0.97(4) 1.79(4) 2.745(3) 165(3) 1 
N1' H1N6 O2'  0.93(3) 1.88(4) 2.800(3) 166(3) 2_665 
N1' H1N5 O3'  0.96(3) 1.89(3) 2.810(3) 160(3) 1 
N2' H2N4 O2  0.82(4) 2.07(4) 2.846(3) 157(3) 1_455 
N2' H2N5 O3  0.84(4) 2.00(4) 2.802(3) 160(3) 2_656 
N2' H2N6 O4'  0.91(4) 1.87(4) 2.766(3) 167(3) 1 
 
_diffrn_measured_fraction_theta_max    0.994 
_diffrn_reflns_theta_full              22.50 
_diffrn_measured_fraction_theta_full   0.994 
_refine_diff_density_max    0.836 
_refine_diff_density_min   -0.496 
_refine_diff_density_rms    0.053 
